# Supplementary material for: ZBP1 activation triggers hematopoietic stem and progenitor cell death resulting in bone marrow failure in mice
Source: PubMed Central journal article supplement — Proc Natl Acad Sci U S A. 2024 Jan 16;121(4):e2309628121. doi: 10.1073/pnas.2309628121 (PMC10823230; doi:10.1073/pnas.2309628121), 2024-01-16
Supplement: pnas.2309628121.sapp.pdf [file pnas.2309628121.sapp.pdf]

## Supporting Information for

### **ZBP1 activation triggers hematopoietic stem and progenitor cell death resulting in bone marrow failure in mice**

Justine E. Roderick<sup>1#</sup>, Sung-Eun Lim<sup>1#</sup>, Sakiko Suzuki<sup>1</sup>, Mohd Hafiz Ahmad<sup>1</sup>, Jonathan Selway<sup>1</sup>, Reem Suleiman<sup>1</sup>, Keshab Karna<sup>1</sup>, Jesse Lehman<sup>1</sup>, Joanne O'Donnell<sup>2</sup>, Lucio H. Castilla<sup>1</sup>, Jonathan Maelfait<sup>3</sup>, Jan Rehwinkel<sup>4</sup> and Michelle A. Kelliher<sup>1\*</sup>

<sup>1</sup>Departments of Molecular, Cell and Cancer Biology and Medicine, Division of Hematology-Oncology, University of Massachusetts Chan Medical School Worcester, MA, 01605, USA

<sup>2</sup>Monash University, Clayton, Vic, 3800 Australia

<sup>3</sup>VIB Center for Inflammation Research, 9052 Ghent, Belgium

<sup>4</sup>Medical Research Council Human Immunology Unit, Medical Research Council Weatherall Institute of Molecular Medicine, Radcliffe Department of Medicine, University of Oxford, Oxford OX3 9DS, United Kingdom

#These authors contributed equally.

\*Address correspondence to: Michelle Kelliher

Email: [Michelle.Kelliher@umassmed.edu](mailto:Michelle.Kelliher@umassmed.edu)

#### **This PDF file includes:**

Supplemental Table 1  
Supplemental Table 2  
Figures S1–S8

**Supplemental Table 1. Flow cytometry antibodies**

| <b>Antibody</b> | <b>Clone</b> | <b>Fluorophore</b>  | <b>Source</b>                |
|-----------------|--------------|---------------------|------------------------------|
| CD11b           | M1/70        | FITC, biotin        | BioLegend                    |
| Gr-1            | RB6-8C5      | PE, biotin          | BD Biosciences               |
| Ly-6C           | HK1.4        | APC                 | BioLegend                    |
| CD3             | 145-2C11     | biotin              | BioLegend                    |
| Ter119          | TER-119      | biotin              | BioLegend                    |
| CD4             | RM4-5        | PerCP/Cy5.5, biotin | BioLegend                    |
| CD8             | 53-6.7       | FITC                | BD Biosciences               |
| B220            | RA3-6B2      | Pe-Cy7, biotin      | BD Biosciences,<br>BioLegend |
| Sca-1           | D7           | APC/Cy7             | BioLegend                    |
| CD34            | RAM34        | FITC                | BD Biosciences               |
| Flk2            | A2F10        | PE                  | BioLegend                    |
| CD150           | TC15-12F12.2 | Pe-Cy7              | BioLegend                    |
| CD86            | GL1          | Pe-Cy7              | Invitrogen                   |

**Supplemental Table 2. Primer Sequences**

| <b>Gene</b>                     | <b>Forward</b>                | <b>Primer R</b>               | <b>Reference</b>                                           |
|---------------------------------|-------------------------------|-------------------------------|------------------------------------------------------------|
| mouse $\beta$ -<br><i>actin</i> | CGAGGCCAGAGCA<br>AGAGAG       | CGGTTGGCCTTAGGGTT<br>CAG      | (Simmons et al. 2012)                                      |
| mouse <i>Zbp1</i>               | AACCCTCAATCAAGT<br>CCTTTACCGC | TCTTCCACGTCTGTCCGT<br>CATAGCT | (Liu et al. 2009)                                          |
| mouse <i>Stat1</i>              | GCTGCCTATGATGT<br>CTCGTTT     | TGCTTTTCCGTATGTTGT<br>GCT     | Primerbank ID<br>328887937c2<br>(Spandidos et al.<br>2010) |
| mouse <i>Mkl1</i>               | TCGATTCTCCCAACA<br>TCTTGC     | GGTGTAGCCTGTATAAG<br>CCTCTG   | Primerbank ID<br>141802525c2                               |
| human $\beta$ -<br><i>ACTIN</i> | CGCGAGAAGATGAC<br>CCAGAT      | GATAGCACAGCCTGGAT<br>AGCAAC   | Kelliher lab stock                                         |
| human<br><i>ZBP1</i>            | AAAGCATGGACGAT<br>TTACCG      | ATGATGTTCCCGTGTCCA<br>AT      | <i>Previously not<br/>published</i>                        |
| human<br><i>MLKL</i>            | AGAGCTCCAGTGGC<br>CATAAA      | TACGCAGGATGTTGGGA<br>GAT      | (Moriwaki et al. 2015)                                     |

## Supplemental Figures

Supplemental Figure 1

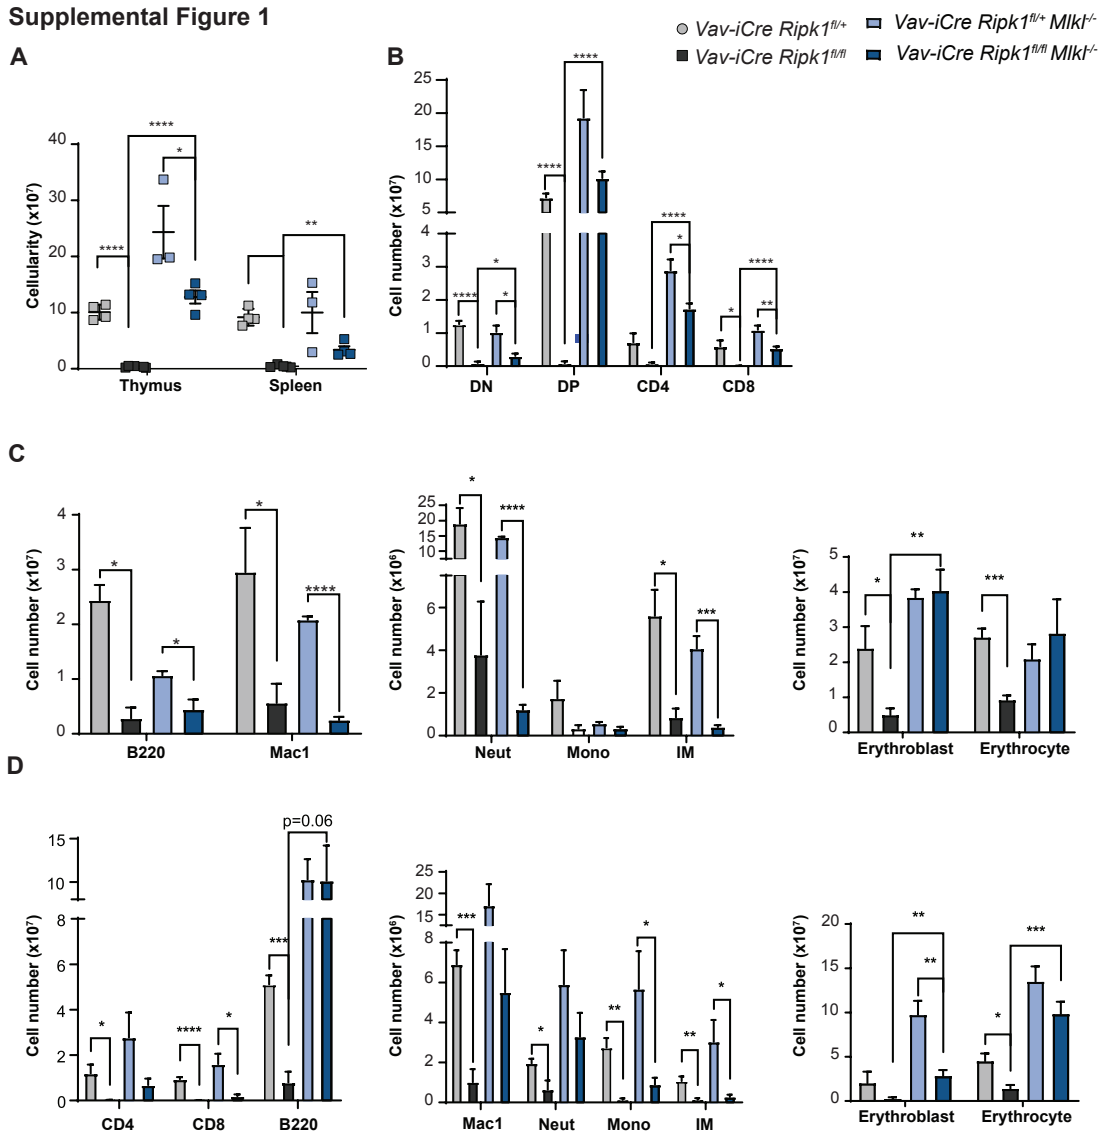

**Supplemental Figure 1. B lymphoid and myeloid lineages remain reduced in *Vav-iCre Ripk1<sup>fl/fl</sup> Mlkl<sup>-/-</sup>* bone marrow but splenic B cells, myeloid cells and erythroid cells increase.**

(A) Thymus and spleen cellularity and (B-D) lineage analysis of thymus (B), bone marrow (C), and spleen (D) of *Vav-iCre Ripk1<sup>fl/+</sup> Mlkl<sup>-/-</sup>* (n=3) and *Vav-iCre Ripk1<sup>fl/fl</sup> Mlkl<sup>-/-</sup>* (n=4) mice at Day 35. Values compared to *Vav-iCre Ripk1<sup>fl/+</sup>* (n=3) and *Vav-iCre Ripk1<sup>fl/fl</sup>* (n=3) mice at day 35 are from Roderick J et al<sup>16</sup>. *Abbreviations:* double negative (DN), CD4 and CD8 double positive (DP), Mac1<sup>+</sup> myeloid cells (Mac1), neutrophils (Neut), monocytes (Mono), and inflammatory monocytes (IM). \*p<0.05, \*\*p<0.01, \*\*\*p<0.001, \*\*\*\*p<0.0001.

## Supplemental Figure 2

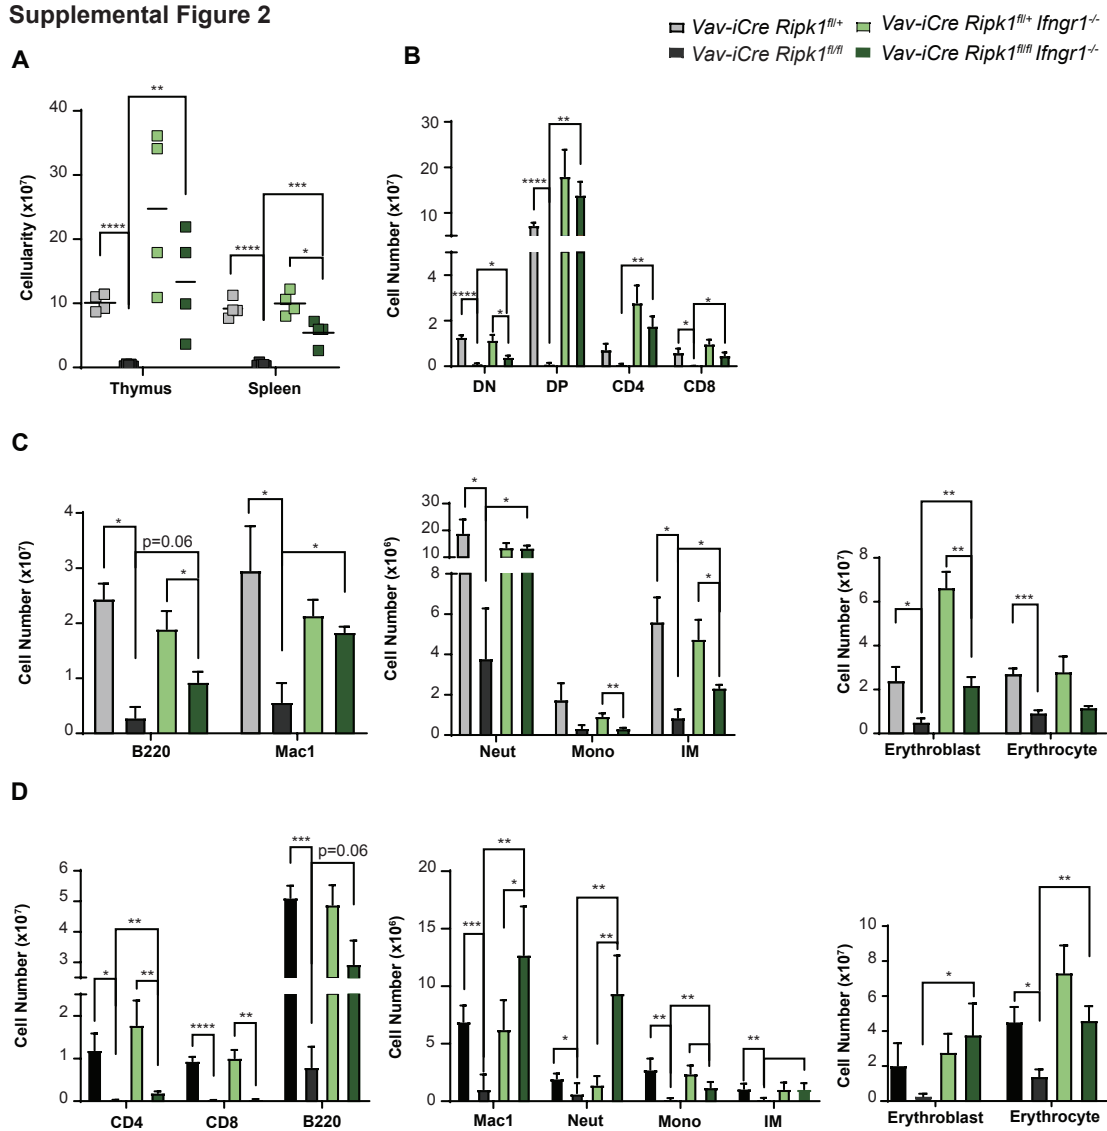

### Supplemental Figure 2. Thymopoiesis and hematopoiesis in bone marrow and spleen is rescued in *Vav-iCre Ripk1<sup>fl/fl</sup> Ifngr1<sup>-/-</sup>* mice.

(A) Thymus and spleen cellularity and (B-D) lineage analysis of thymus (B), bone marrow (C), and spleen (D) of control *Vav-iCre Ripk1<sup>fl/+</sup> Ifngr1<sup>-/-</sup>* (n=4) and *Vav-iCre Ripk1<sup>fl/fl</sup> Ifngr1<sup>-/-</sup>* (n=3) mice at day 35. Values compared to *Vav-iCre Ripk1<sup>fl/+</sup>* (n=3) and *Vav-iCre Ripk1<sup>fl/fl</sup>* (n=3) mice at day 35 as published in<sup>16</sup>. *Abbreviations:* double negative (DN), CD4 and CD8 double positive (DP), Mac1<sup>+</sup> myeloid cells (Mac1), neutrophils (Neut), monocytes (Mono), and inflammatory monocytes (IM). \*p<0.05, \*\*p<0.01, \*\*\*p<0.001, \*\*\*\*p<0.0001.

**Supplemental Figure 3**

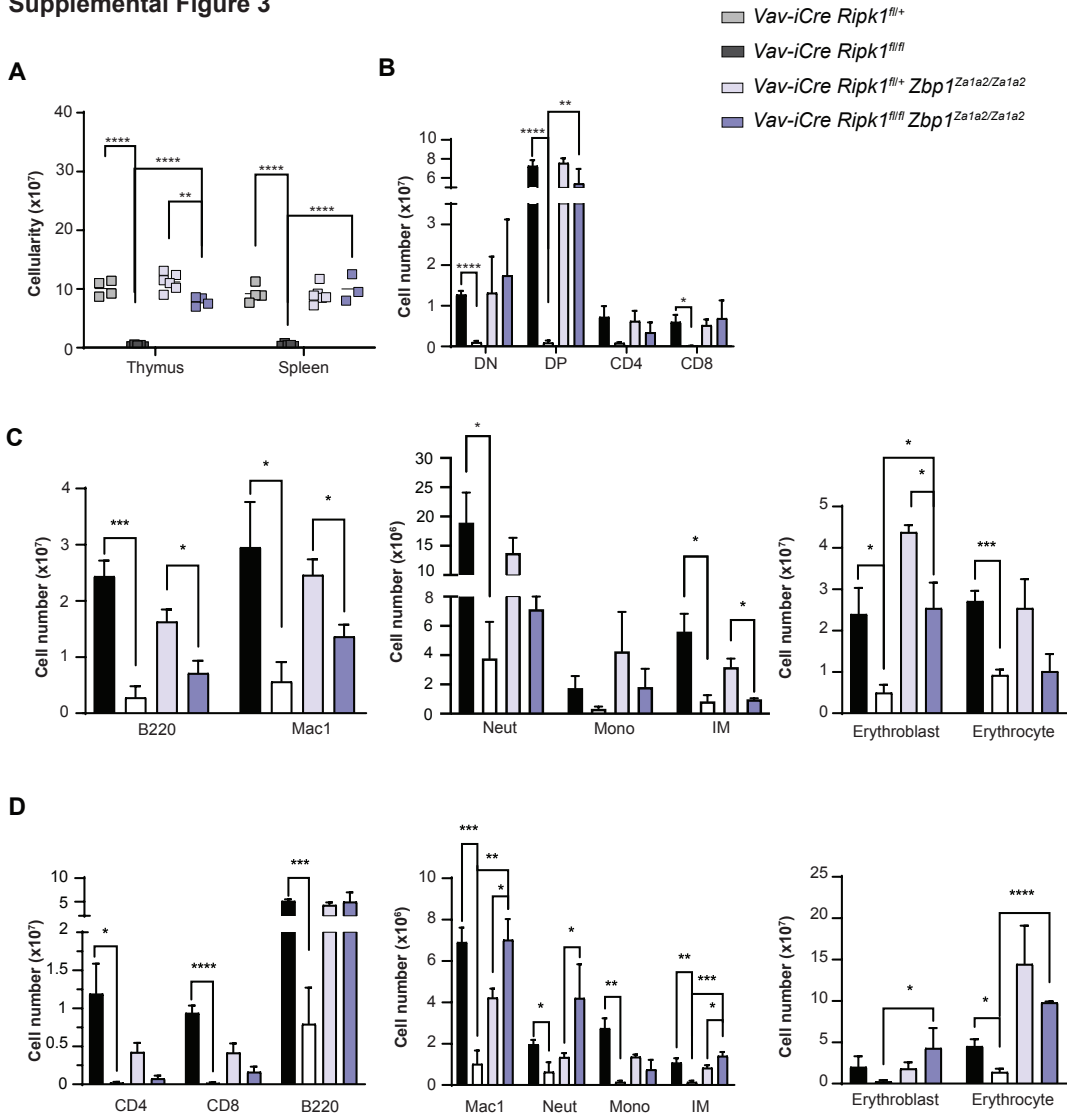

**Supplemental Figure 3. Expression of mutant *Zbp1* that cannot sense Z-nucleic acids rescues thymopoiesis and hematopoiesis in *Vav-iCre Ripk1<sup>fl/fl</sup>* mice.**

(A) Thymus and spleen cellularity, (B-D) lineage analysis of thymus (B), bone marrow (C), and spleen (D) of control *Vav-iCre Ripk1<sup>fl/+</sup> Zbp1<sup>Za1a2/Za1a2</sup>* (n = 4) and *Vav-iCre Ripk1<sup>fl/fl</sup> Zbp1<sup>Za1a2/Za1a2</sup>* (n = 3) mice at day 35. Values compared to *Vav-iCre Ripk1<sup>fl/+</sup>* (n=4) and *Vav-iCre Ripk1<sup>fl/fl</sup>* (n=3) mice at day 35 as published in<sup>16</sup>. *Abbreviations:* double negative (DN), CD4 and CD8 double positive (DP), *Mac1*<sup>+</sup> myeloid cells (*Mac1*), neutrophils (Neut), monocytes (Mono), and inflammatory monocytes (IM). \*p<0.05, \*\*p<0.01, \*\*\*p<0.001, \*\*\*\*p<0.0001.

Supplemental Figure 4

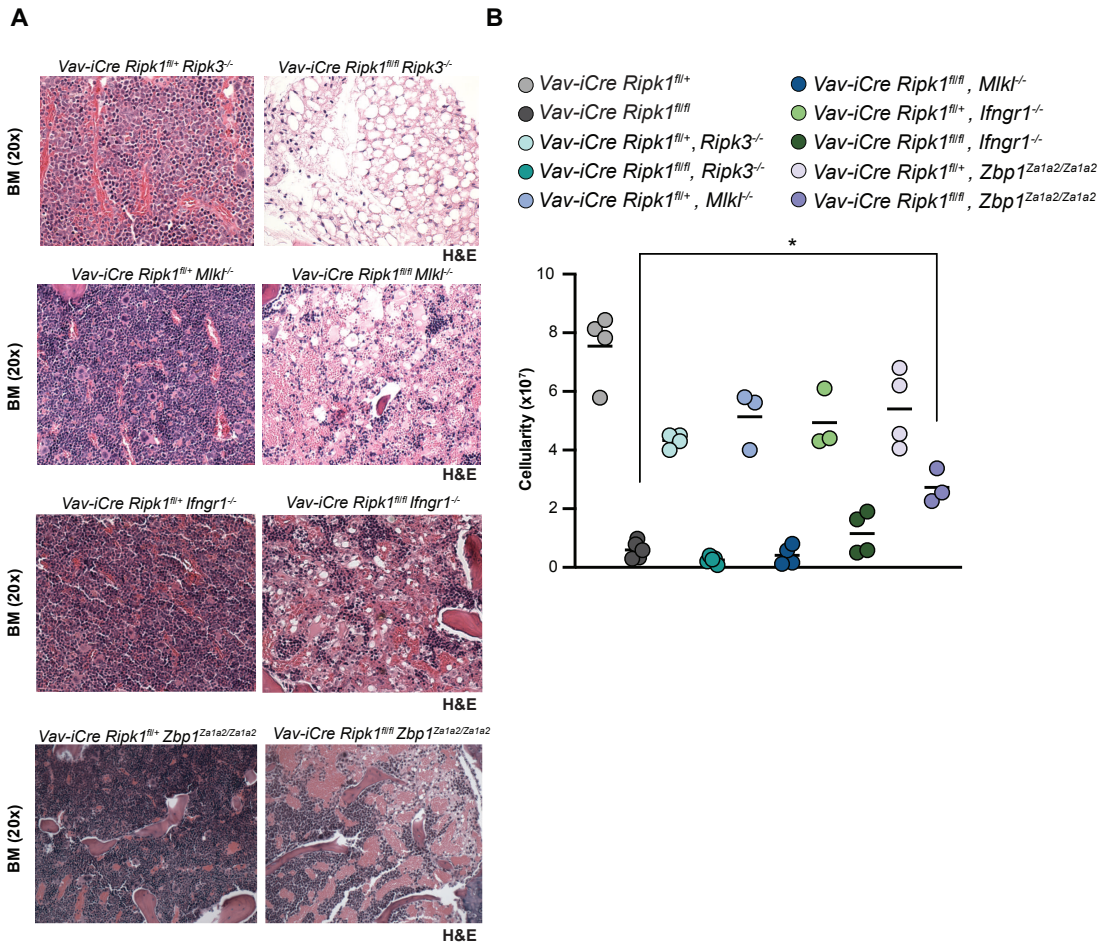

Supplemental Figure 4. *Vav-iCre Ripk1<sup>fl/fl</sup> Ripk3<sup>-/-</sup>, Mlkl<sup>-/-</sup>, Ifngr1<sup>-/-</sup> or Zbp1<sup>Za1a2/Za1a2</sup>* mice eventually succumb to BMF.

(A) Representative images of H&E-stained BM from littermate controls (left) of *Vav-iCre Ripk1<sup>fl/fl</sup> Ripk3<sup>-/-</sup>, Mlkl<sup>-/-</sup>, Ifngr1<sup>-/-</sup> or Zbp1<sup>Za1a2/Za1a2</sup>* mice at time of disease. (B) BM cellularity of littermate controls (n=3–4) compared to *Vav-iCre Ripk1<sup>fl/fl</sup> Ripk3<sup>-/-</sup>, Mlkl<sup>-/-</sup>, Ifngr1<sup>-/-</sup> or Zbp1<sup>Za1a2/Za1a2</sup>* mice (n=3–4 mice/genotype). \*p<0.05.

**Supplemental Figure 5**

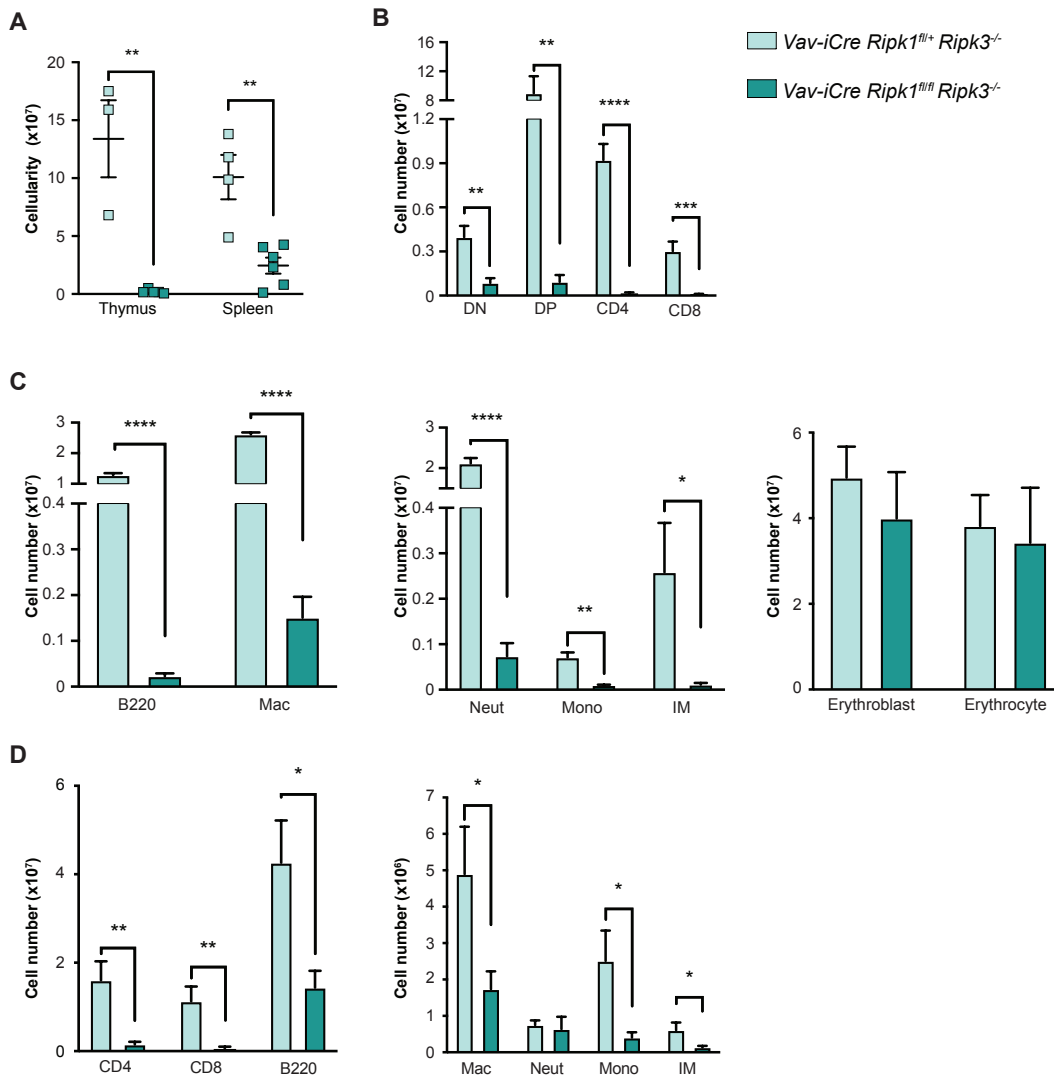

**Supplemental Figure 5. *Vavi-Cre Ripk1<sup>fl/fl</sup> Ripk3<sup>-/-</sup>* mice exhibit lymphoid and myeloid lineage loss in all hematopoietic compartments at time of disease.**

(A) Thymus and spleen cellularity, (B-D) lineage analysis of thymus (B) bone marrow (C) and spleen (D) of control *Vavi-Cre Ripk1<sup>fl/fl</sup> Ripk3<sup>-/-</sup>* (n=3–4) and *Vavi-Cre Ripk1<sup>fl/fl</sup> Ripk3<sup>-/-</sup>* (n = 4–5) mice at time of disease. *Abbreviations:* double negative (DN), CD4 and CD8 double positive (DP), Mac1<sup>+</sup> myeloid cells (Mac1), neutrophils (Neut), monocytes (Mono), and inflammatory monocytes (IM). \*p<0.05, \*\*p<0.01, \*\*\*p<0.001, \*\*\*\*p<0.0001.

## Supplemental Figure 6

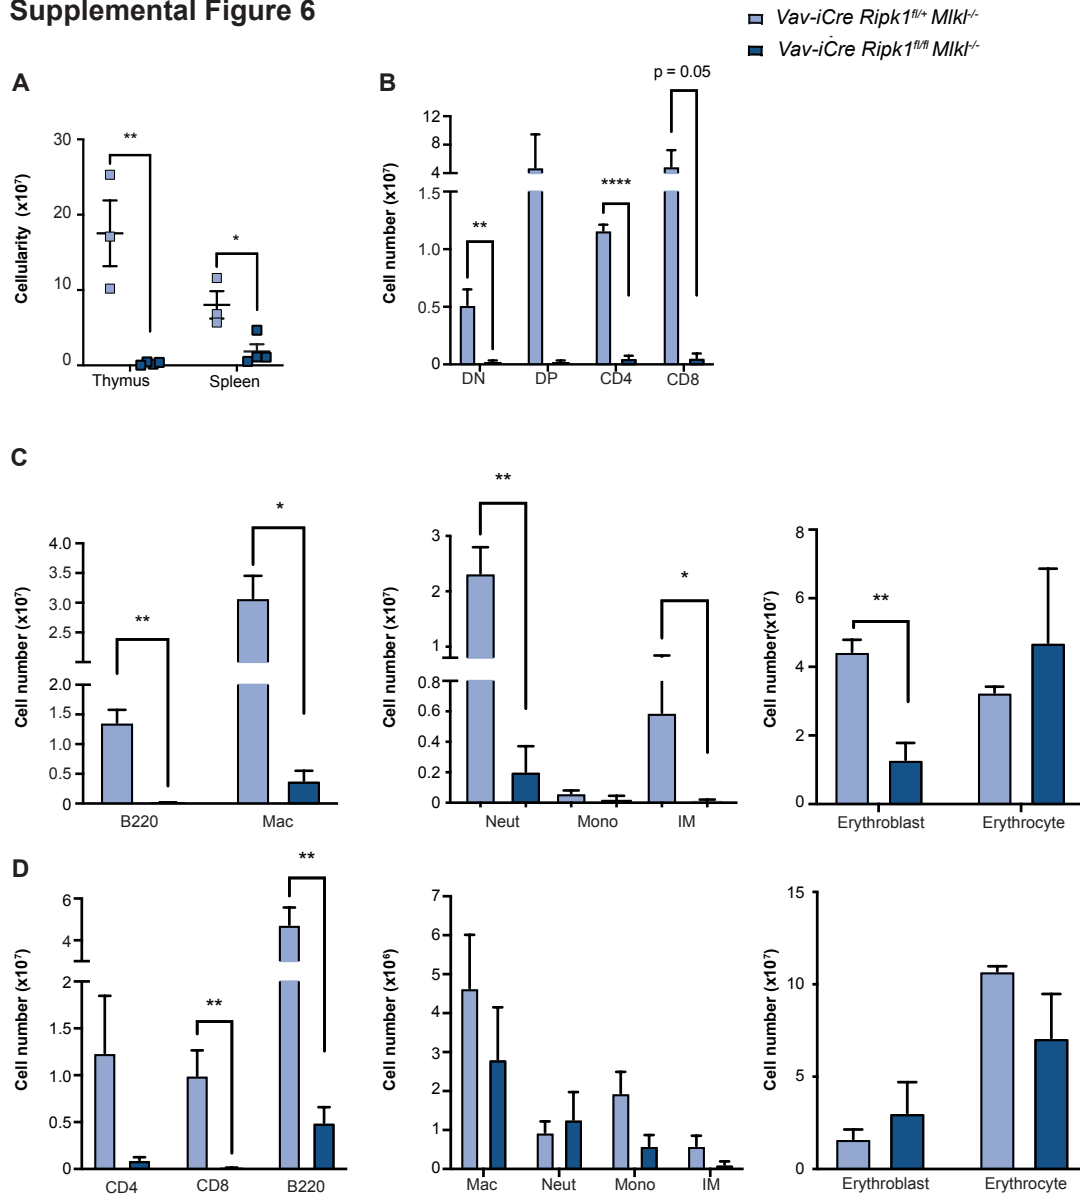

### Supplemental Figure 6. *Vav-iCre Ripk1<sup>fl/fl</sup> Mik1<sup>-/-</sup>* mice show reductions in all hematopoietic compartments at time of disease.

(A) Thymus and spleen cellularity, (B-D) lineage analysis of thymus (B), bone marrow (C), and spleen (D) of *Vav-iCre Ripk1<sup>fl/fl</sup> Mik1<sup>-/-</sup>* (n=3) and *Vav-iCre Ripk1<sup>fl/fl</sup> Mik1<sup>-/-</sup>* (n=4) mice at time of disease. *Abbreviations:* double negative (DN), CD4 and CD8 double positive (DP), Mac1<sup>+</sup> myeloid cells (Mac1), neutrophils (Neut), monocytes (Mono), and inflammatory monocytes (IM). \*p<0.05, \*\*p<0.01, \*\*\*\*p<0.0001.



Supplemental Figure 7

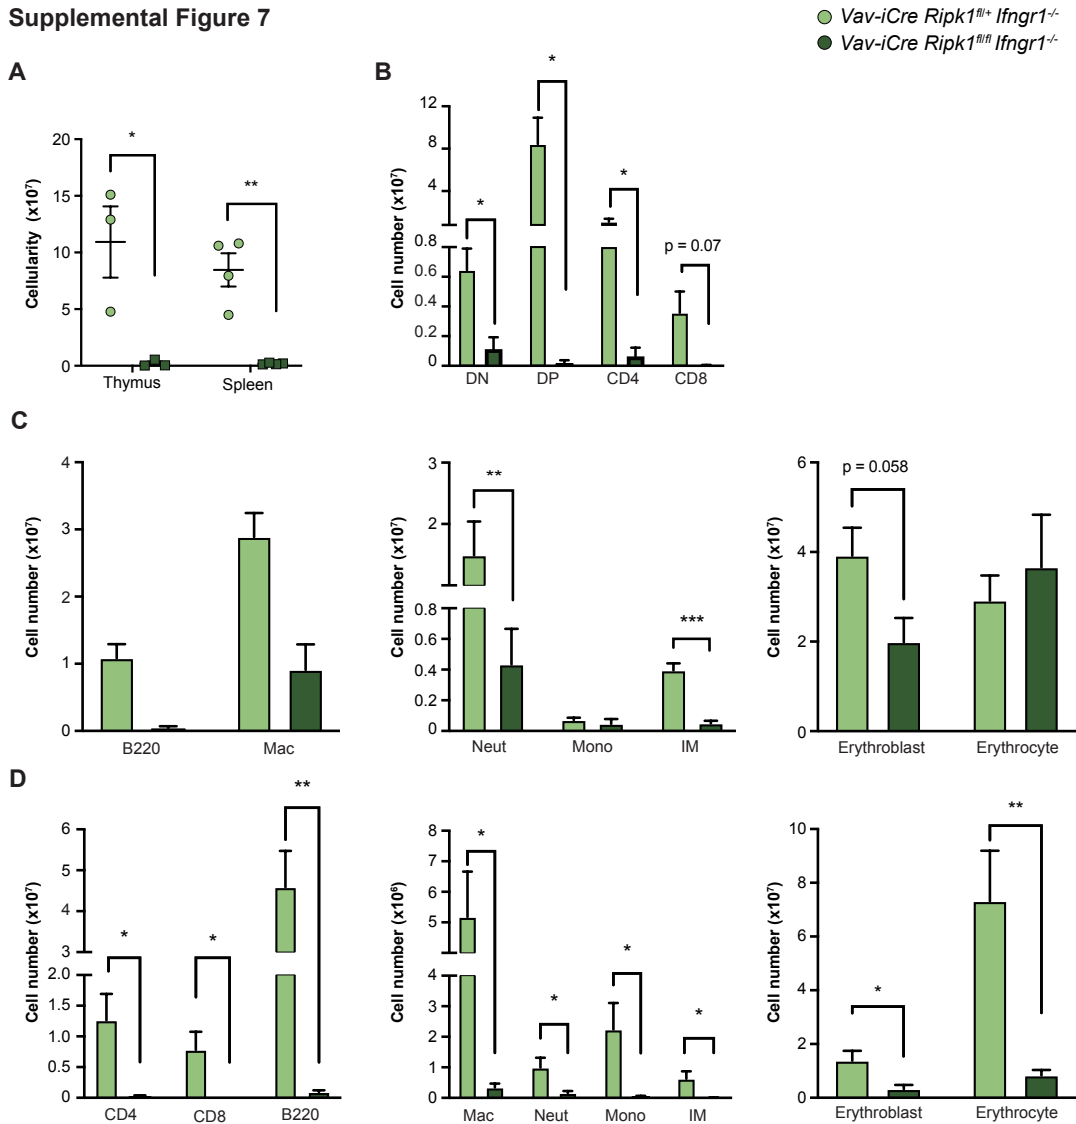

**Supplemental Figure 7. *Vavi-Cre Ripk1<sup>fl/fl</sup> Ifngr1<sup>-/-</sup>* mice exhibit lymphoid and myeloid lineage loss in all hematopoietic compartments at time of disease**

(A) Thymus and spleen cellularity and (B-D) lineage analysis of thymus (B), bone marrow (C), and spleen (D) of *Vavi-Cre Ripk1<sup>fl/fl</sup> Ifngr1<sup>-/-</sup>* (n=3) and *Vavi-Cre Ripk1<sup>fl/fl</sup> Ifngr1<sup>-/-</sup>* (n=4) mice at time of disease. *Abbreviations:* double negative (DN), CD4 and CD8 double positive (DP), Mac1<sup>+</sup> myeloid cells (Mac), neutrophils (Neut), monocytes (Mono), and inflammatory monocytes (IM). \*p < 0.05, \*\*p < 0.01, \*\*\*p < 0.001.

**Supplemental Figure 8**

○ *Vav-iCre Ripk1<sup>fl/+</sup> Zbp1<sup>Za1a2/Za1a2</sup>*  
 ● *Vav-iCre Ripk1<sup>fl/fl</sup> Zbp1<sup>Za1a2/Za1a2</sup>*

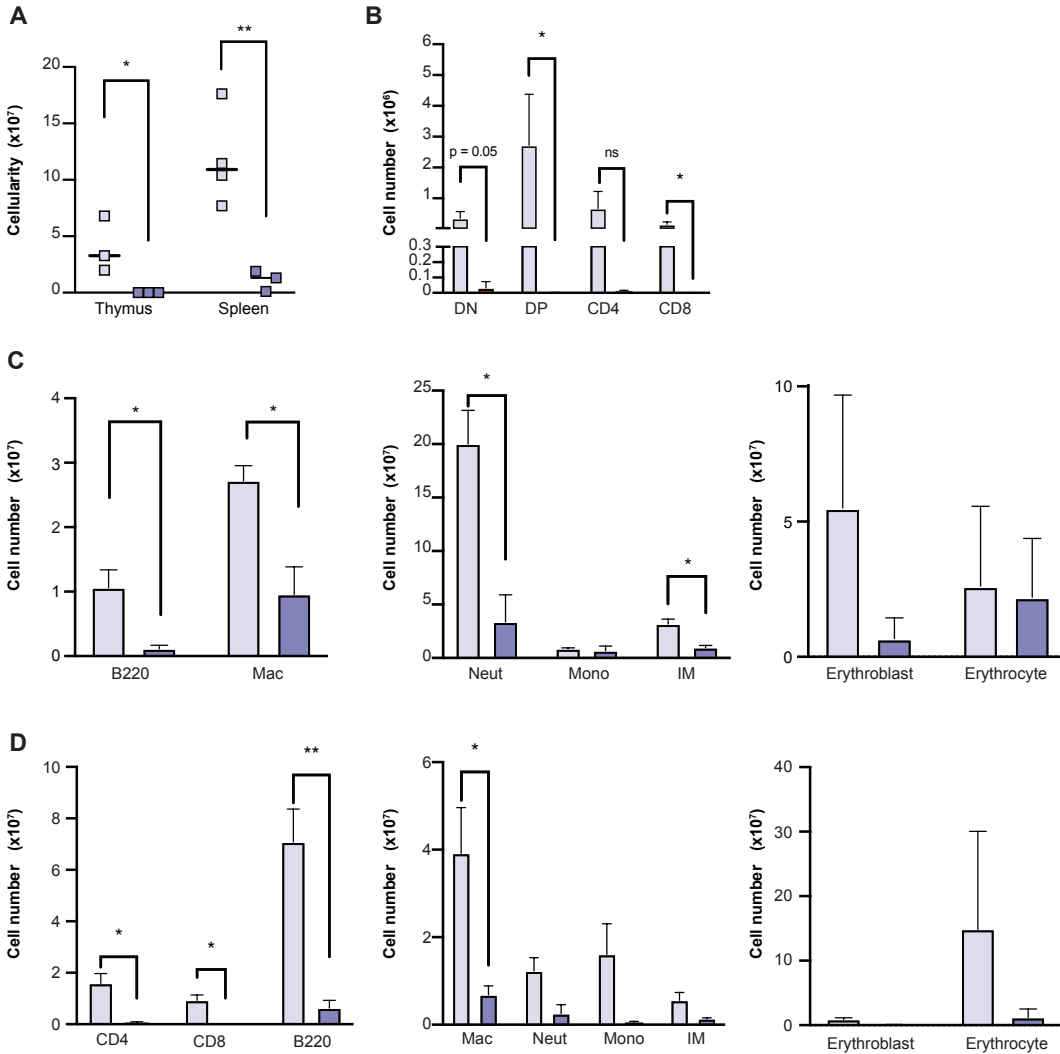

**Supplemental Figure 8. *Vav-iCre Ripk1<sup>fl/fl</sup> Zbp1<sup>Za1a2/Za1a2</sup>* mice exhibit lymphoid and myeloid lineage loss in all hematopoietic compartments at time of disease.**

(A) Thymus and spleen cellularity and (B-D) lineage analysis of thymus (B), bone marrow (C), and spleen (D) of *Vav-iCre Ripk1<sup>fl/+</sup> Zbp1<sup>Za1a2/Za1a2</sup>* (n=4) and *Vav-iCre Ripk1<sup>fl/fl</sup> Zbp1<sup>Za1a2/Za1a2</sup>* (n=3) mice at time of disease. *Abbreviations:* double negative (DN), CD4 and CD8 double positive (DP), Mac1<sup>+</sup> myeloid cells (Mac1), neutrophils (Neut), monocytes (Mono), and inflammatory monocytes (IM). \*p<0.05, \*\*p<0.01.
